# Supplementary material
Source: PubMed Central journal article supplement (PMC10792472)
Supplement: jama-e2325092-s002.pdf [file jama-e2325092-s002.pdf]

1  
2  
3  
4  
5  
6  
7  
8  
9  
10  
11  
12  
13  
14  
15  
16  
17  
18  
19  
20  
21  
22  
23  
24  
25  
26

# Statistical Analysis Plan (SAP)

## Randomized Evaluation of Default Access to Palliative Services (REDAPS) Trial

|                               |                                        |
|-------------------------------|----------------------------------------|
| <b>Sponsor</b>                | NIH/ National Institute on Aging (NIA) |
| <b>NIH Grant Number</b>       | UH2-AG-050311                          |
| <b>Principal Investigator</b> | Scott D. Halpern, MD, PhD              |
| <b>Faculty Statistician</b>   | Dylan Small, PhD                       |
| <b>Senior Statistician</b>    | Marzana Chowdhury, PhD                 |
| <b>CT.gov number</b>          | NCT02505035                            |
| <b>Penn IRB number</b>        | 822134                                 |
| <b>Original SAP</b>           | June 1, 2016                           |
| <b>Final SAP</b>              | February 8, 2022                       |

Table of Contents

27  
28  
29  
30  
31  
32  
33  
34  
35  
36  
37  
38  
39  
40  
41  
42  
43  
44  
45  
46  
47  
48  
49  
50  
51  
52  
53  
54  
55  
56  
57  
58  
59  
60  
61

**A. Final Statistical Analysis Plan..... 4**

I. DESIGN AND RANDOMIZATION ..... 4

II. POPULATION ..... 4

III. PRIMARY OUTCOME AND ANALYTIC METHOD ..... 5

    A. PRIMARY OUTCOME ..... 5

    B. PRIMARY ANALYTIC SAMPLE ..... 5

    C. PRIMARY ANALYSIS ..... 5

    D. SECONDARY ANALYSIS ..... 6

    E. SENSITIVITY ANALYSIS ..... 6

    F. COMPLIER AVERAGE TREATMENT EFFECT (CATE) ANALYSIS: ACCOUNTING FOR NON-ADHERENCE<sup>2</sup> ..... 7

    G. ANALYSES OF EFFECT MODIFIERS ..... 8

IV. SECONDARY OUTCOMES ..... 8

    A. SECONDARY OUTCOME MEASURES ..... 9

    B. ANALYSIS OF SECONDARY OUTCOMES ..... 9

V. APPROACH TO MISSING DATA..... 9

VI. SAMPLE SIZE AND STATISTICAL POWER CALCULATIONS..... 9

    A. SAMPLE SIZE..... 9

    B. STATISTICAL POWER CALCULATIONS ..... 10

VII. DATA SAFETY & MONITORING BOARD (DSMB)..... 10

VIII. SAFETY DATA AND INTERIM ANALYSIS ..... 10

    A. TRIAL STOPPING RULES / SAFETY MONITORING MEASURES ..... 10

    B. TIMING OF ANALYSIS AND ADJUSTMENT OF SIGNIFICANCE LEVEL ..... 10

    C. PERSON PERFORMING ANALYSIS..... 11

IX. REFERENCES ..... 11

**B. SAP Amendments..... 12**

**C. Original Statistical Analysis Plan..... 15**

X. DESIGN AND RANDOMIZATION ..... 15

XI. POPULATION ..... 15

XII. PRIMARY OUTCOME AND ANALYTIC METHOD ..... 16

    A. PRIMARY OUTCOME ..... 16

    B. PRIMARY ANALYTIC SAMPLE ..... 16

|    |    |                                                                                                    |           |
|----|----|----------------------------------------------------------------------------------------------------|-----------|
| 62 | C. | PRIMARY ANALYSIS .....                                                                             | 16        |
| 63 | D. | SECONDARY ANALYSIS .....                                                                           | 17        |
| 64 | E. | SENSITIVITY ANALYSIS .....                                                                         | 17        |
| 65 | F. | COMPLIER AVERAGE TREATMENT EFFECT (CATE) ANALYSIS: ACCOUNTING FOR NON-ADHERENCE <sup>2</sup> ..... | 17        |
| 66 | G. | ANALYSES OF POTENTIAL CLINICIAN AND PATIENT-LEVEL EFFECT MODIFIERS .....                           | 18        |
| 67 |    | <b>XIII. SECONDARY OUTCOMES .....</b>                                                              | <b>18</b> |
| 68 | A. | SECONDARY OUTCOMES .....                                                                           | 18        |
| 69 | B. | ANALYSIS OF SECONDARY OUTCOMES .....                                                               | 19        |
| 70 |    | <b>XIV. APPROACH TO MISSING DATA.....</b>                                                          | <b>19</b> |
| 71 |    | <b>XV. SAMPLE SIZE AND STATISTICAL POWER CALCULATIONS.....</b>                                     | <b>19</b> |
| 72 | A. | SAMPLE SIZE.....                                                                                   | 19        |
| 73 | B. | STATISTICAL POWER CALCULATIONS .....                                                               | 20        |
| 74 |    | <b>XVI. DATA SAFETY &amp; MONITORING BOARD (DSMB).....</b>                                         | <b>20</b> |
| 75 |    | <b>XVII.SAFETY DATA AND INTERIM ANALYSIS .....</b>                                                 | <b>20</b> |
| 76 | A. | TRIAL STOPPING RULES / SAFETY MONITORING MEASURES .....                                            | 20        |
| 77 | B. | TIMING OF ANALYSIS AND ADJUSTMENT OF SIGNIFICANCE LEVEL .....                                      | 20        |
| 78 | C. | PERSON PERFORMING ANALYSIS.....                                                                    | 21        |
| 79 |    | <b>XVIII.REFERENCES .....</b>                                                                      | <b>21</b> |
| 80 |    |                                                                                                    |           |
| 81 |    |                                                                                                    |           |

## Final Statistical Analysis Plan

82  
83

### 84 I. Design and randomization

85 The REDAPS study is a stepped-wedge, cluster-randomized, pragmatic clinical trial.

86 ○ Comparators: The study compares the status quo paradigm where physicians must identify patients  
87 who may benefit from inpatient palliative care (PC) consult services and actively order such services  
88 (“usual care”) with an opt out paradigm in which patients meeting consensus criteria for eligibility for PC  
89 are identified by the electronic health record (EHR) and a PC consultation is ordered by default  
90 (“intervention”). Physicians may cancel the default order for PC after being alerted to it and patients or  
91 family members may decline such services.

92 ○ Stepped wedge intervals: All 11 participating hospitals first contribute a minimum of 4 months of  
93 data collection under the usual care paradigm of PC consultation. Then, using a stepped-wedge design,  
94 the hospitals are randomly assigned to begin the intervention in intervals spaced approximately 2.4  
95 months apart, representing the average of 8 hospitals having 2.7-month intervals between them and the  
96 other 3 EHR-linked hospitals having 1.5-month intervals. By the end of the 32-month trial, all hospitals  
97 will have utilized the intervention of default PC consultation for at least 3 months.

98 ○ Randomization plan: Eleven hospitals were randomized to transition into the intervention arm  
99 sequentially. Among the 11 hospitals, 8 hospitals were randomized individually and the remaining 3  
100 hospitals were treated as a single block because they shared a OneChart EHR platform that necessitated  
101 intervention implementation in close proximity (within six weeks). We assigned numbers 1 through 9  
102 randomly to the 8 hospitals and the block and using the random number generator from Random.org.  
103 The 3 hospitals within the block were then individually randomized to decide on the sequence that they  
104 received the intervention.

105

106 *See the accompanying Study Protocol for details of the study design, objectives, methods, and oversight.*

107 *The Study Protocol Amendment Log details changes to the stepped wedge intervals reflected above.*

108

### 109 II. Population

110 We sought to identify patients who (1) have sufficiently complex needs to likely benefit from specialized  
111 PC; (2) could be screened easily with a few criteria, thereby augmenting the pragmatic nature of the trial  
112 and real-world applicability of the results; and (3) differed from those patients most commonly included  
113 in prior or ongoing studies of PC, specifically cancer and heart failure patients, thereby optimally  
114 expanding the evidence base. These principles led us to include patients who met the following criteria:  
115

- 116 1. Age  $\geq$  65 years old; **AND**
- 117 2. Hospital length of stay (LOS)  $\geq$  72 hours; **AND**
- 118 3. Any one of the following diagnoses:  
119

#### 120 **Chronic Obstructive Pulmonary Disease (COPD)**

- 121 ○ w/ chronic home oxygen use OR  $\geq$  two hospitalizations within 12 months

#### 122 **End-Stage Renal Disease (ESRD)**

- 123 ○ w/ chronic dialysis therapy

#### 124 **Dementia**

- 125 ○ w/ admission from a long-term care facility (LTC), or surgical feeding tube in place at the  
126 time of admission, or  $\geq$  two hospitalizations within 12 months

127  
128 *International Classification of Diseases, 9<sup>th</sup> and 10th Revisions, Clinical Modification codes can be found*  
129 *in Table S2 of the online supplement. Our accompanying Study Protocol details the rationale for*  
130 *changing the age criterion from  $\geq 45$  years to  $\geq 65$  years.*

131  
132 **III. Primary outcome and analytic method**

133 **a. Primary outcome**

134 The primary outcome is a combined metric of two traditional EHR-based outcomes, hospital mortality  
135 and hospital length of stay (LOS). The composite measure of in-hospital mortality and hospital LOS ranks  
136 deaths along the LOS distribution,<sup>1</sup> typically at or near the longest end of this distribution.

137 Defined as [Time 1: time of hospital discharge] – [Time 0: time of enrollment]

138 For the primary analysis, we will place death at the 99<sup>th</sup> percentile of the LOS distribution.

139 **b. Primary analytic sample**

140 Our inclusion criteria specify that a patient must be in hospital for at least 72 hours to be included in the  
141 study. However, at the time of eligibility determination and enrollment (*which occurs before 72 hours*)  
142 we are unable to know if a patient will still be in the hospital at 72 hours. We will undertake a modified  
143 intention-to-treat (mITT) approach, from which patients with a LOS <72 hours are excluded (i.e., *the 72-*  
144 *hour rule is a standard exclusion criterion but it is just one that is not known at the time of allocation*).  
145 The proposed mITT will more accurately reflect inpatient PC consult effectiveness and cost-effectiveness  
146 among the pre-specified eligible cohort.

147 **c. Primary analysis**

148 We will transform the primary outcome to its log value to account for skewness in LOS. Assuming the log  
149 of the LOS follows a normal distribution, we will use a mixed-effects model, for analyzing this stepped-  
150 wedge, cluster randomized trial as follows:

$$Y_{ijk} = \mu + \alpha_i + \beta_j + X_{ij}\theta + \gamma_k + e_{ijk}$$

151 where  $Y_{ijk}$  denotes the response from individual (with suitable transformation)  $k$  at time  $j$  from cluster  
152  $i$ ;  $\alpha_i$  is a random effect for cluster  $i$ ;  $X_{ij}$  is the treatment indicator for cluster  $i$  at time  $j$ ,  $\theta$  is the  
153 treatment effect and the residual is *iid* with  $e_{ijk} \sim N(0, \sigma_e^2)$ . Since the intervention occurs over time, the  
154 proportion of clusters exposed to the intervention gradually increases. We will include step as a fixed  
155 effect ( $\beta_j$ ) in the model to adjust for the potential confounding factor from calendar time. We will add a  
156 random effect for individuals ( $\gamma_k$ ) to account for the repeated measures because some patients will be  
157 present in multiple periods because the level of analyses is the hospital encounter.

158  
159 Further, though not listed above in the base model, primary analyses will also seek to adjust for  
160 imbalance in clusters' and/or patients' characteristics arising from the stepped wedge design. To do so,  
161 we will add terms  $\gamma_1 \mathbf{Z}_{ijk}$  and  $\gamma_2 \mathbf{W}_{ij}$  to the model, where  $\mathbf{Z}$  and  $\mathbf{W}$  represent vectors of patient and cluster  
162 characteristics, respectively, that could be related to outcomes. Note that the index  $j$  in these matrices  
163 allows us to include time-varying covariates. One particular  $\mathbf{Z}_{ijk}$  we will attempt to include is the "time  
164 since first enrollment" for patients with subsequent eligible encounters, thereby accounting for possible  
165 differences in primary or secondary outcomes as disease progresses, independent of any effect of  
166 intervention vs. usual care or of calendar time. We will include these additional terms in primary models  
167 to augment precision in estimating the treatment effects.

168

169 If LOS or other appropriate transformation of LOS is not normally distributed, we will use a suitable  
 170 modeling approach to account for the non-normality. Specific models that will be considered include  
 171 count models. For example, negative binomial models, Quantile regression or others depending on the  
 172 distribution of the data.

173 All analyses will be conducted using Stata (StataCorp, College Station, Texas) or R (Vienna, Austria).

**Patient-level covariate factors for adjustment**

| <i>Patient level covariates</i>                            | <i>Variable coding or definition</i>  |
|------------------------------------------------------------|---------------------------------------|
| • Age                                                      | Continuous                            |
| • Gender                                                   | Binary                                |
| • Ethnicity                                                | Binary                                |
| • Race                                                     | Categorical                           |
| • Marital status                                           | Categorical                           |
| • Time (in days) since first enrollment                    | Continuous                            |
| • Hospital admission source                                | Categorical                           |
| • Eligible diagnosis (COPD; ESRD; Dementia)                | Binary (indicator) for each diagnosis |
| • Severity of illness (Elixhauser comorbidity index score) | Continuous                            |
| • In ICU at time of intervention                           | Binary                                |

174  
 175  
 176 **d. Secondary analysis**  
 177 ○ Analysis of LOS in the ITT sample with adjusted mixed effects model with random effects for  
 178 hospitals and fixed effects for time.

179  
 180 **e. Sensitivity analysis**  
 181 ○ An assessment of the impact of different rankings of death in the LOS distribution. We plan to  
 182 place death at the 75<sup>th</sup> through the 95<sup>th</sup> percentiles in 10 percentile intervals (i.e., 75<sup>th</sup>, 85<sup>th</sup>, and  
 183 95<sup>th</sup>) and will assess the change in the estimation.  
 184 ○ We will also conduct the following sensitivity analyses to determine whether extensions to this  
 185 basic model change our results:

186 **(1) Unadjusted mixed effects model:** To understand the potential contribution of patient-  
 187 level baseline characteristics, we will conduct an unadjusted analysis of LOS in the mITT  
 188 sample with random effects for hospital and fixed effects for time.

189 **(2) Time effect might differ across clusters:** To account for the possibility that the time effect  
 190 might not be the same for all clusters, we will add a random interaction term for the  
 191 cluster-time combination  $\tau_{ij}$ .

192 **(3) Treatment effect might be delayed:** To account for the possibility that the effects of the  
 193 intervention might not be observed until sometime after it is introduced, we will change  
 194  $X_{ij}\theta$  to  $X_{ijl}\theta_l$  to account for the number of steps (or months) since the intervention was  
 195 introduced in cluster  $i$ .

196  
197  
198  
199  
200  
201  
202  
203  
204  
205  
206  
207  
208  
209  
210  
211  
212  
213  
214  
215  
216  
217

- **Time-to-event model:** To address common alternative approaches for analyzing LOS, we plan to analyze the LOS outcome (without ranking death) as time-to-event data using 2 approaches: (1) Clustered competing-risks model where the event of interest is discharged alive and we will treat 'death' as the competing event, and (2) Mixed-effects Cox proportional model where we will treat death as a censoring event.

**f. Complier Average Treatment Effect (CATE) analysis: accounting for non-adherence<sup>2</sup>**

As in most pragmatic trials, there are reasons that patients enrolled in this trial's intervention arm may not receive PC. Each of these forms of non-adherence creates differences between the intervention's *effectiveness* (which incorporates non-adherence and is assessed using intention-to-treat analyses) and its *efficacy* (which asks how well the intervention works for those who receive it). We will evaluate efficacy in secondary, explanatory analyses, using the MITT sample, that use modern methods of causal inference to address the fact that analyses restricted to those who receive the intervention do not maintain the virtues of randomization and may be influenced by selection effects. We will use methods developed by the Penn investigative team in which the randomization arm is modeled as an instrumental variable (IV) in analyses of RCTs with non-adherence, promoting unbiased estimates of the efficacy of the intervention.

The CATE approach entails a two-stage least-squares regression in which the randomization arm is modelled as an instrumental variable. This analysis will also be adjusted for cluster and time.

The adherence pathway for this study will be as follows:

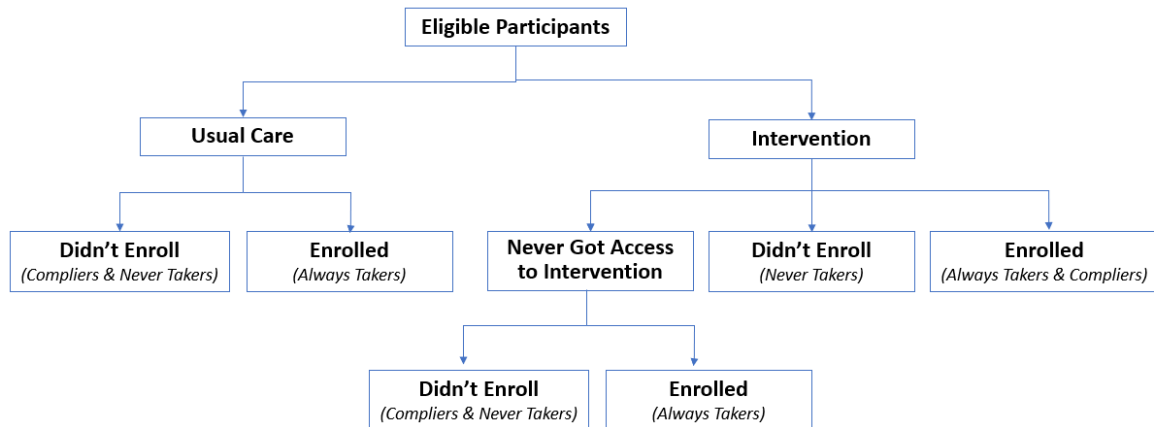

218  
219  
220  
221  
222  
223  
224  
225

Among those assigned to the intervention, there are three different reasons why they may not receive the intervention (from least to most common):

- Group 1: A procedural error in the EHR default alert rule resulted in the default order not firing as intended for some patients (i.e., *they should have received the treatment, but didn't*) – although this situation very rarely occurred, these patients are included in the MITT. These patients will be some combination of *Compliers* and *Never Takers*.

- 226 ○ Group 2: The default order fired (they received the treatment) but the primary team cancelled the  
227 default order within 24 hours (before the order was sent to the PC team) – this is a more common  
228 scenario and these patients will be considered as *Never Takers*.
- 229 ○ Group 3: The default order fired and was not cancelled (the order was sent to the PC team), but the  
230 patient did not receive PC – this is the most common scenario. We will consider these patients as  
231 *Never Takers*.

232  
233 **g. Analyses of effect modifiers**

234 We will assess the extent to which the patient characteristics and PC consult characteristics modify the  
235 size of the effect of PC on the primary outcome. This will answer the question as to which PC  
236 characteristics are associated with the greatest benefits, and which types of patients are particularly  
237 likely to benefit from PC. By virtue of the trial’s pragmatic design and large sample size, it provides high  
238 statistical power to determine how these and other service-level and patient-level factors alter the  
239 effectiveness of PC. We will explore effect modification by conducting analyses stratified by the different  
240 values of the PC or patient factors. If differences appear, we will formally evaluate for effect  
241 modification by testing the significance of the coefficients for statistical interaction terms between the  
242 potential effect modifier and the study period (intervention or usual care) on the primary outcome.  
243 Importantly, we evaluate PC-level factors (rolling up characteristics of the services they provide across  
244 patients) rather than patient-level receipt of specific services because analyses of the latter variables  
245 would be subject to confounding by indication (e.g., sicker patients may be seen by a physician).

| Effect modifiers of intervention on hospital LOS |                                      |
|--------------------------------------------------|--------------------------------------|
| <i>Patient level covariates</i>                  | <i>Variable coding or definition</i> |
| • Age                                            | Continuous                           |
| • Gender (female vs male)                        | Binary                               |
| • Race (Black vs White)                          | Categorical                          |
| • Location at time of intervention (ICU vs ward) | Categorical                          |
| • Eligible dementia diagnosis vs not             | Binary                               |
| • Eligible ESRD diagnosis vs not                 | Binary                               |
| • Eligible COPD diagnosis vs not                 | Binary                               |
| • Marital status (Married vs not)                | Binary                               |
| • Hospital admission source (SNF vs home)        | Categorical                          |

246  
247  
248  
249  
250 **IV. Secondary Outcomes**

251 We will assess numerous clinical and palliative care process measures after enrollment including:  
252



253  
254  
255  
256

**a. Secondary outcome measures**

| <b>Secondary outcome measures</b>      |                                                                                             |
|----------------------------------------|---------------------------------------------------------------------------------------------|
| <b><i>Outcome measure</i></b>          | <b><i>Variable coding or definition</i></b>                                                 |
| • In-hospital death                    | Binary                                                                                      |
| • ICU mortality                        | Binary; yes if death occurs in ICU or within 24 hours of transfer from ICU to hospice       |
| • Discharge to hospice                 | Binary                                                                                      |
| • DNR at discharge                     | Binary                                                                                      |
| • Receipt of CPR                       | Binary                                                                                      |
| • Transfer to ICU                      | Binary; excludes participants who spent the total duration of the study encounter in an ICU |
| • Invasive mechanical ventilation      | Binary; initiation of MV after enrollment                                                   |
| • Count of 30-day hospital readmission | Count; if a new encounter is >12 hours after discharge from prior encounter                 |
| • 30-day hospital readmission rate     | Rate; if a new encounter is >12 hours after discharge from prior encounter                  |
| • Time to PC consult                   | Continuous; time from hospital admission to the first signed PC consult note                |

257  
258  
259  
260  
261  
262  
263

**b. Analysis of secondary outcomes**

Secondary outcomes will be analyzed using the mITT and ITT samples. We plan to analyze the data with mixed-effects logistic regression for binary outcomes and mixed-effects count models depending on the dispersion parameter for count outcomes. Count models will be formulated with an offset term to account for differential length of follow-up.

**V. Approach to missing data**

We do not anticipate substantial missing data because all outcomes will be obtained through the hospitals' EHR systems. If any of the factors of adjustment (listed in the first table) has missing values >10% we will exclude those from the basic model and will look at the effect estimate changes.

**VI. Sample size and statistical power calculations**

**a. Sample size**

We queried the EHRs of two Ascension hospitals during calendar year 2013 to identify patients who would meet our eligibility criteria, and to determine how many of those patients had received PC. Around 961 patients met all eligibility criteria, of whom 79 (8.3%) received PC. By considering the proportion of total beds in the 11-hospital sample accounted for by these two hospitals and extrapolating to all 11 hospitals, we estimate that >15,000 patients will be eligible for trial enrollment.

276 *Our final analyses included a total of 34,239 patients (ITT), reflecting that the number of patients in the*  
277 *11-hospital sample exceeded initial estimates extrapolated from two hospitals.*

#### 278 **b. Statistical power calculations**

279 Even using the conservative assumption of an intra-cluster (within-hospital) correlation of patient  
280 outcomes of up to  $\rho=0.20$  (design effect =  $1+(n-1)*\rho = 2.6$ ), this design provides greater than 80% power  
281 to detect a difference in the primary outcome between intervention and control of 0.5 days at the  
282 median with  $\alpha = 0.05$ . It provides >99% power to detect differences of 1 day at the median. These  
283 analyses assume that the composite outcome of hospital length of stay and mortality follows a log  
284 normal distribution with a median of 5.5 days (mean of 8.3 days) in the control group (corresponding to  
285 a standard deviation of 7.9 days). Unlike prior RCTs of PC, we will be specifically powered to determine  
286 how different PC team structures and practices influence the benefits of PC, and the characteristics of  
287 patients who derive the greatest benefits. Our estimates using the formula of Hughes and Hussey and  
288 confirmed with Monte Carlo simulation suggest that we will have 80% power to detect small effects for  
289 both patient-level effect modifiers (which vary among patients within and among hospitals) and cluster-  
290 level effect modifiers (which vary among services).

291

#### 292 **VI. Data Safety & Monitoring Board (DSMB)**

293 Data and Safety Monitoring Board (DSMB) has been convened by the NIA to oversee the conduct of the  
294 REDAPS trial and monitor patient safety. The DSMB is comprised of individuals with expertise in  
295 palliative care, bioethics, clinical trial conduct, vulnerable populations, decision making, and  
296 biostatistics. The DSMB Chair, Dr. Joan Teno, is a world-renowned expert on measuring and evaluating  
297 interventions to improve the quality of medical care for seriously ill and dying patients. Members of the  
298 DSMB will not be involved in the conduct of the trial. Once convened, the DSMB will perform several  
299 duties. First, they will review and approve the research protocol and plans for data and safety  
300 monitoring prior to the study. Second, they will evaluate the progress of the trial. This will include  
301 assessment of data quality, participant accrual and retention, participant risk versus benefit, and study  
302 outcomes. The DSMB will meet regularly and make recommendations to the trial sponsor (NIA) about  
303 study progress and safety and will make recommendations about trial continuation. We will charge  
304 DSMB members with using their judgment in simultaneously considering many data points in making  
305 decisions about trial design modifications and trial continuation or termination.

306

#### 307 **VII. Safety data and interim analysis**

##### 308 **a. Trial stopping rules / safety monitoring measures**

309 We do not plan to stop the trial early for evidence of the effectiveness of the intervention because doing  
310 so would markedly reduce our power to detect which types of PC are most useful and which types of  
311 patients derive the most benefit from PC. However, we do propose to stop the trial for early evidence of  
312 harm based on the primary outcome (composite measure of in-hospital mortality and hospital LOS).

##### 313 **b. Timing of analysis and adjustment of significance level**

314 The DSMB has recommended implementing the following statistical modifications to preserve the study-  
315 wide alpha level. We will calculate a Lan-DeMets spending function using O'Brien-Fleming boundaries to  
316 preserve the overall significance level of 0.05 for the interaction terms. The interim tests would use one-  
317 sided significance levels of 0.0007 and 0.0161. At the second interim analysis, for example, this is  
318 equivalent to calculating a one-sided 98.39% lower confidence bound for the treatment coefficient in

319 the primary outcome model. If the lower bound of the confidence interval for the change in the  
320 composite outcome exceeds two days at either interim analysis, we will propose early termination of  
321 the trial to the DSMB. Final analyses will be conducted at a significance level of 0.0451. This design  
322 allows for early termination if there is strong evidence of harm, without substantially impacting the  
323 significance level for the final analyses.

324 **c. Person performing analysis**

325 Statistical analysis will be performed by the trial’s statistician who will be blinded to trial arm. The trial’s  
326 data manager will be the only person who knows the identity of the arms during the trial’s conduct and  
327 will provide the statistician with primary outcomes and safety data with dummy variables indicating  
328 each arm. The analyst will return the results to the data manager for inclusion in the interim analysis  
329 report to the DSMB. All members of the investigative team except the data manager will remain blinded  
330 to treatment arm and facility for the analysis.

331

332 **IX. References**

- 333 1. Lin, Winston, Scott D Halpern, Meeta Prasad Kerlin, and Dylan S Small. “A ‘Placement of Death’  
334 Approach for Studies of Treatment Effects on ICU Length of Stay.” *Statistical Methods in Medical*  
335 *Research* 26, no. 1 (February 2017): 292–311. doi:10.1177/0962280214545121.  
336 2. Baiocchi, Michael, Jing Cheng, and Dylan S. Small. "Instrumental Variable Methods for Causal  
337 Inference." *Statistics in Medicine* 33, no. 13 (2014): 2297-340. doi:10.1002/sim.6128.

338

339

340

341

342

343

344

345

346

347

348

349

350

351

352

353

354

355

## SAP Amendments

356  
357  
358  
359  
360  
361  
362  
363  
364  
365  
366  
367  
368  
369  
370  
371  
372  
373  
374  
375  
376  
377  
378  
379  
380  
381  
382  
383  
384  
385  
386  
387  
388  
389  
390  
391  
392  
393  
394  
395  
396  
397  
398

Concept: Primary outcome definition  
Date: 07.01.2017  
Summary: Hospital LOS is defined as [Time 1: Hospital discharge] – [Time 0: Time of enrollment, at 3:00 PM Hospital Day 1]  
Justification: This amendment was made *a priori*, before analysis and presentation of results in the first interim analyses to the DSMB in July 2017. This change is based on recommendations regarding the concept of "immutable" time laid out by PI Halpern in the 2017 *American Journal of Epidemiology* manuscript. Eligibility for the study is first assessed at 3:00 PM Hospital Day 1, at which time a future-dated PC consult order is generated by the EHR. Only the LOS after 3:00 PM Hospital Day 1 can be plausibly altered by the intervention. Although LOS was previously undefined in the Original SAP, it is traditionally defined as beginning at the time of hospital admission, thus warranting a description of this change herein.  
Reference *Harhay MO, Ratcliffe S, Halpern SD. Measurement Error Due to Patient Flow in Estimates of Intensive Care Unit Length of Stay. Am J Epidemiol; 2017 Dec 15;186(12):1389-1395. doi: 10.1093/aje/kwx222*  
Concept: Primary analysis  
Date: 09.20.2018  
Summary: Primary analytic approach will include patient encounters, including rare circumstances in which the default order was not automatically generated for some apparently eligible cases in the intervention phase due to an EHR system glitch.  
Justification: Our primary analytic approach is maximally conservative by including all patient encounter data in the mITT and ITT. This is merely a clarification of our primary analytic approach, not a change; we had not specified our approach to handling this issue initially as we had not foreseen it arising.  
Concept: Secondary outcomes  
Date: 05.10.2019  
Summary: Secondary outcome amended to 'New initiation of mechanical ventilation after enrollment'  
Justification: Our Original SAP stated that we wished to analyze Days of Mechanical Ventilation; however, this was not possible due to data limitations across the 8 Ascension ministries.  
Concept: Secondary outcomes  
Date: 05.10.2019  
Summary: Secondary outcomes (including palliative care process measures) removed: (1) pain scores, (2) dyspnea, (3) documentation of goals of care, (4) documentation of family meetings, (5) documentation of durable power of attorney, (6) documentation of pain assessment, (7) PC team visits per patients, (8) use of bowel regimen for patients on opioids

399 Justification: Data are collated by the central Ascension informatics team from separate EHRs of 8  
400 Ascension ministries. These data are either not routinely collected in discrete fields,  
401 have high missing values, or are non-standardized in their collection. After extensive  
402 exploration of these data fields, these data were considered too unreliable to be  
403 reported.  
404

405 Concept: Effect modifiers  
406 Date: 05.10.2019  
407 Summary: We had planned to measure whether duration of the existence of the PC program or the  
408 proportion of consults in a hospital staffed by a physician modified the effect of default  
409 orders, but eliminated these plans

410 Justification: Data are collated by the central Ascension informatics team from separate EHRs of 8  
411 Ascension ministries. These data are either not routinely collected in discrete fields, are  
412 non-standardized in their collection across hospitals, or are not represented at all  
413 hospitals (in the case of spiritual care). After extensive exploration of these data fields,  
414 these data were considered too unreliable to be reported. Duration of the existence of  
415 the PC program and proportion of consults staffed by a physician were not included in  
416 the analyses.  
417

418 Concept: Primary analysis, sensitivity analyses  
419 Date: 06.18.2019  
420 Summary: Adjustment variables in models with be excluded if there are missing values >10%.  
421 Sensitivity analyses will exclude marital status and insurance status as patient-level  
422 covariate adjustment factors

423 Justification: We do not anticipate substantial missing data because the outcomes data is obtained  
424 through the hospitals' EHR systems; however, we set a standard for what levels of  
425 missing data would warrant exclusion (and further analysis of the effect of excluding  
426 those variables on the estimates). Additionally, EHR data was re-extracted after  
427 completion of the study, pulling in the latest values for patient demographics; however,  
428 some patient covariates captured within the EHR can be non-stable over time, namely  
429 marital status and insurance.  
430

431 Concept: Primary outcome - sensitivity analysis  
432 Date: 07.16.2019  
433 Summary: For the primary analysis, we will place death at the 99<sup>th</sup> percentile of the LOS  
434 distribution in the linear mixed effects model and conduct sensitivity analyses placing  
435 death at the 75<sup>th</sup> through the 95<sup>th</sup> percentiles in 10 percentile intervals (i.e. 75<sup>th</sup>, 85<sup>th</sup>,  
436 and 95<sup>th</sup>).

437 Justification: Our measure of hospital LOS ranks deaths along the LOS distribution, typically at or near  
438 the longest end of this distribution and uses sensitivity analyses to assess the impact of  
439 different ranking. Although there are no changes to our intended approach, we did not  
440 fully specify the percentile intervals for the sensitivity analyses in the Original SAP and  
441 they are included in the Final SAP.  
442

443 Concept: Effect modifiers

444 Date: 02.23.2021  
445 Summary: We removed proposed patient-level effect modifiers: (1) insurance status, and (2) zip  
446 code  
447 Justification: When the age of eligibility was increased from  $\geq 45$  to  $\geq 65$ , as described above, it  
448 resulted in nearly 100% of the sample having Medicare as the primary payer thus it was  
449 determined that it would be a noninformative analysis. Zip code was highly correlated  
450 with cluster and was dropped from the model.  
451  
452 Concept: Primary analysis  
453 Date: 02.24.2021  
454 Summary: Primary analytic model will add an adjustment for patients' "time since enrollment."  
455 Justification: We need to adjust for imbalance in patients' characteristics arising from the stepped  
456 wedge design. Including "time since enrollment" is to account for possible differences in  
457 primary or secondary outcomes as disease progresses, independent of any effect of  
458 intervention vs. usual care or of calendar time. We will include these additional terms in  
459 primary models to augment precision in estimating the treatment effects.  
460  
461 Concept: Primary outcome, sensitivity analyses  
462 Date: 04.30.2021  
463 Summary: Two additional pre-specified analyses of hospital LOS without ranking death: (1)  
464 Clustered competing risk model in which death was considered a competing event, and  
465 (2) Mixed-effect Cox proportional model in which death was considered a censoring  
466 event.  
467 Justification: We have added these analyses to check the robustness of our results using different  
468 modelling approaches as different models have different assumptions.  
469  
470 Concept: Primary analysis, sensitivity analyses  
471 Date: 6.03.2021  
472 Summary: We prespecified a sensitivity analysis that included an intervention-by-cluster  
473 interaction term to account for potential heterogeneity in treatment effect across  
474 clusters.  
475 Justification: Model convergence could not be achieved.  
476  
477 Concept: Secondary outcomes  
478 Date: 07.30.2021  
479 Summary: Definition of 'hospital discharge disposition' changed from multiple categories (home,  
480 home with home care, home hospice, inpatient hospice, nursing facility, long-term  
481 acute care facility, other) to a binary variable (hospice discharge vs not).  
482 Justification: The multi-category approach was not possible to report reliably due to significant  
483 variation in categories of discharge disposition reported by the 8 Ascension ministries.  
484 The only hypothesized causal pathway for inpatient palliative care to influence  
485 discharge disposition that is supported by existing evidence is on hospice use (regardless  
486 of location where receiving hospice care), and hospice disposition was reported reliably  
487 by all sites.  
488

489 Concept: Secondary outcomes  
490 Date: 02.08.2022  
491 Summary: We will amend the definition of the previously specified secondary outcome ‘date of the  
492 first palliative care consult’ to ‘time to completed consult,’ defined as the time between  
493 hospital admission and the first signed palliative care consult note  
494 Justification: Our original SAP included the process outcome ‘date of the first palliative care consult’  
495 however time-to-consult (measured from admission) is a more granular and informative  
496 way to capture this measure, and is aligned with prior reports in the literature.  
497

## 498 Original Statistical Analysis Plan

### 499 500 **X. Design and randomization**

501 The REDAPS study is a stepped-wedge, cluster-randomized, pragmatic clinical trial.

502 ○ Comparators: The study compares the status quo paradigm where physicians must identify patients  
503 who may benefit from inpatient palliative care (PC) consult services and actively order such services  
504 (“usual care”) with an opt out paradigm in which patients meeting consensus criteria for eligibility for PC  
505 are identified by the electronic health record (EHR) and a PC consultation is ordered by default  
506 (“intervention”). Physicians may cancel the default order for PC after being alerted to it and patients or  
507 family members may decline such services.

508 ○ Stepped wedge intervals: All 11 participating hospitals first contribute a minimum of 3.5 months of  
509 data collection under the usual care paradigm of PC consultation. Then, using a stepped-wedge design,  
510 the hospitals are randomly assigned to begin the intervention in intervals spaced approximately 2.4  
511 months apart, representing the average of 8 hospitals having 2.7-month intervals between them and the  
512 other 3 EHR–linked hospitals having 1.5-month intervals. By the end of the 31-month trial, all hospitals  
513 will have utilized the intervention paradigm of PC consultation for at least 3.5 months.

514 ○ Randomization plan: Eleven hospitals were randomized into the intervention arm sequentially.  
515 Among the 11 hospitals, 8 hospitals were randomized individually and the remaining 3 hospitals were  
516 treated as a single block because they shared a OneChart EHR platform that necessitated intervention  
517 implementation in close proximity (within six weeks). We assigned numbers 1 through 9 randomly to the  
518 8 hospitals and the block and using the random number generator from Random.org. The 3 hospitals  
519 within the block were then randomized to decide on the sequence that they received the intervention.  
520

521 *See the accompanying Study Protocol for details of the study design, objectives, methods, and oversight.*  
522

### 523 **XI. Population**

524 We sought to identify patients who (1) have sufficiently complex needs to likely benefit from specialized  
525 PC; (2) could be screened easily with a few criteria, thereby augmenting the pragmatic nature of the trial  
526 and real-world applicability of the results; and (3) differed from those patients most commonly included  
527 in prior or ongoing studies of PC, specifically cancer and heart failure patients, thereby optimally  
528 expanding the evidence base. These principles led us to include patients who met the following criteria:  
529

- 530 4. Age  $\geq$  45 years old; **AND**
- 531 5. Hospital length of stay (LOS)  $\geq$  72 hours; **AND**
- 532 6. Any one of the following diagnoses:

- 533  
 534 **Chronic Obstructive Pulmonary Disease (COPD)**  
 535 ○ w/ chronic home oxygen use OR ≥ two hospitalizations within 12 months  
 536 **End-Stage Renal Disease (ESRD)**  
 537 ○ w/ chronic dialysis therapy  
 538 **Dementia**  
 539 ○ w/ admission from a long-term care facility (LTC), or surgical feeding tube in place at the  
 540 time of admission, or ≥ two hospitalizations within 12 months

541  
 542 *International Classification of Diseases, 9<sup>th</sup> and 10th Revisions, Clinical Modification codes can be found*  
 543 *in Table S2 of the online supplement.*

544  
 545 **II. Primary outcome and analytic method**

546 **a. Primary outcome**

547 The primary outcome is a combined metric of two traditional EHR-based outcomes, hospital mortality  
 548 and hospital LOS. The composite measure of in-hospital mortality and hospital LOS ranks deaths along  
 549 the LOS distribution,<sup>1</sup> typically at or near the longest end of this distribution. For the primary analysis,  
 550 we will place death at the 99<sup>th</sup> percentile of the LOS distribution.

551 **b. Primary analytic sample**

552 Our inclusion criteria specify that a patient must be in hospital for at least 72 hours to be included in the  
 553 study. However, at the time of eligibility determination and enrollment (*which occurs before 72 hours*)  
 554 we are unable to know if a patient will still be in the hospital at 72 hours. We will undertake a modified  
 555 Intention-to-treat (mITT), from which patients with a LOS <72 hours are excluded (*the 72-hour rule is a*  
 556 *standard exclusion criterion but it is just one that is not known at the time of allocation*). The proposed  
 557 mITT will more accurately reflect inpatient PC consult effectiveness and cost-effectiveness among the  
 558 pre-specified eligible cohort.

559 **c. Primary analysis**

560 We will transform the primary outcome to its log value to account for skewness in LOS. Assuming the log  
 561 of the LOS follows a normal distribution, we will use a mixed-effects model, for analyzing this stepped-  
 562 wedge, cluster randomized trial as follows:

$$Y_{ijk} = \mu + \alpha_i + \beta_j + X_{ij}\theta + \gamma_k + e_{ijk}$$

563 where  $Y_{ijk}$  denotes the response from individual (with suitable transformation)  $k$  at time  $j$  from cluster  
 564  $i$ ;  $\alpha_i$  is a random effect for cluster  $i$ ;  $X_{ij}$  is the treatment indicator for cluster  $i$  at time  $j$ ,  $\theta$  is the  
 565 treatment effect and the residual is *iid* with  $e_{ijk} \sim N(0, \sigma_e^2)$ . Since the intervention occurs over time, the  
 566 proportion of clusters exposed to the intervention gradually increases. We will include step as a fixed  
 567 effect ( $\beta_j$ ) in the model to adjust for the potential confounding factor from calendar time. We will add a  
 568 random effect for individuals ( $\gamma_k$ ) to account for the repeated measures because some patients will be  
 569 present in multiple periods because the level of analyses is the hospital encounter. Further, though not  
 570 listed above in the base model, primary analyses will also seek to adjust for imbalance in clusters' and/or  
 571 patients' characteristics arising from the stepped wedge design. To do so, we will add terms  $\gamma_1 \mathbf{Z}_{ijk}$  and  
 572  $\gamma_2 \mathbf{W}_j$  to the model, where  $\mathbf{Z}$  and  $\mathbf{W}$  represent vectors of patient and cluster characteristics, respectively,  
 573 that could be related to outcomes. Note that the index  $j$  in these matrices allows us to include time-  
 574 varying covariates. We will include these additional terms in primary models to augment precision in  
 575 estimating the treatment effects.



576 If LOS or other appropriate transformation of LOS is not normally distributed, we will use a suitable  
577 modeling approach to account for the non-normality. Specific models that will be considered include  
578 count models. For example, negative binomial models, Quantile regression or others depending on the  
579 distribution of the data.

580 All analyses will be conducted using Stata (StataCorp, College Station, Texas) or R (Vienna, Austria).  
581

#### *Patient-level covariates for Adjustment*

- Source of hospital admission: home vs. nursing facility
- Life-limiting illness: COPD vs. ESRD vs. Dementia
- Marital status
- Location in hospital: ICU vs. ward
- Stage of disease: early vs. late

582

#### 583 **d. Secondary analysis**

- 584 ○ Analysis of LOS in the ITT with adjusted mixed effects model with random effects for hospitals and  
585 fixed effects for time.

586

#### 587 **e. Sensitivity analysis**

- 588 ○ **Unadjusted mixed effects model:** Analysis of the LOS in the mITT without patient-level  
589 characteristics, with random effects for hospital and fixed effects for time.

590

- 591 ○ **Composite primary outcome measure:** Sensitivity analyses of the impact of different rankings of  
592 death in the LOS distribution.

- 593 ○ **Time effect might differ across clusters:** To account for the possibility that the time effect might not  
594 be the same for all clusters, we will add a random interaction term for the cluster-time combination  
595  $\tau_{ij}$ .

- 596 ○ **Treatment effect might be delayed:** To account for the possibility that the effects of the  
597 intervention might not be observed until some time after it is introduced, we will change  $X_{ij}\theta$  to  
598  $X_{ijl}\theta_l$  to account for the number of steps (or months) since the intervention was introduced in  
599 cluster  $i$ .

- 600 ○ **Treatment effect might differ across clusters:** To account for potential heterogeneity in treatment  
601 effect across clusters, we will add a random intervention-by-cluster interaction term.

602

#### 603 **f. Complier Average Treatment Effect (CATE) analysis: accounting for non-adherence<sup>2</sup>**

604 As in most pragmatic trials, there are reasons that patients enrolled in this trial's intervention arm may  
605 not receive PC. Each of these forms of non-adherence creates differences between the intervention's  
606 *effectiveness* (which incorporates non-adherence and is assessed using intention-to-treat analyses) and  
607 its *efficacy* (which asks how well the intervention works for those who receive it). We will evaluate  
608 efficacy in secondary, explanatory analyses, using the mITT sample, that use modern methods of causal  
609 inference to address the fact that analyses restricted to those who receive the intervention do not

610 maintain the virtues of randomization and may be influenced by selection effects. We will use methods  
 611 developed by the Penn investigative team in which the randomization arm is modeled as an  
 612 instrumental variable (IV) in analyses of RCTs with non-adherence, promoting unbiased estimates of the  
 613 efficacy of the intervention.

614 The CATE approach entails a two-stage least-squares regression in which the randomization arm is  
 615 modelled as an instrumental variable. This analysis will also be adjusted for cluster and time.

616

617 **g. Analyses of potential clinician and patient-level effect modifiers**

618 We will assess the extent to which the patient characteristics and PC consult characteristics modify the  
 619 size of the effect of PC on the primary outcome. This will answer the question as to which PC  
 620 characteristics are associated with the greatest benefits, and which types of patients are particularly  
 621 likely to benefit from PC. By virtue of the trial’s pragmatic design and large sample size, it provides high  
 622 statistical power to determine how these and other service-level and patient-level factors alter the  
 623 effectiveness of PC. We will explore effect modification by conducting analyses stratified by the different  
 624 values of the PC or patient factors. If differences appear, we will formally evaluate for effect  
 625 modification by testing the significance of the coefficients for statistical interaction terms between the  
 626 potential effect modifier and the study period (intervention or usual care) on the primary outcome.  
 627 Importantly, we evaluate PC-level factors (rolling up characteristics of the services they provide across  
 628 patients) rather than patient-level receipt of specific services because analyses of the latter variables  
 629 would be subject to confounding by indication (e.g., sicker patients may be seen by a physician).

**Potential modifiers of the effects of PC consultative services**

| <i>PC consult factors</i>                                                                                                        | <i>Patient factors</i>                                                                                                                          |
|----------------------------------------------------------------------------------------------------------------------------------|-------------------------------------------------------------------------------------------------------------------------------------------------|
| <ul style="list-style-type: none"> <li>• Proportion of consults in which goals of care are documented</li> </ul>                 | <ul style="list-style-type: none"> <li>• Source of hospital admission: home vs. nursing facility</li> </ul>                                     |
| <ul style="list-style-type: none"> <li>• Proportion of consults in which provision of spiritual support is documented</li> </ul> | <ul style="list-style-type: none"> <li>• Life-limiting illness: COPD vs. ESRD vs. Dementia</li> <li>• Marital status: married vs not</li> </ul> |
| <ul style="list-style-type: none"> <li>• Proportion of consults staffed by a physician</li> </ul>                                | <ul style="list-style-type: none"> <li>• Location in hospital: ICU vs. ward</li> </ul>                                                          |
| <ul style="list-style-type: none"> <li>• Duration of existence of the PC program</li> </ul>                                      | <ul style="list-style-type: none"> <li>• Stage of disease: early vs. late</li> </ul>                                                            |

630 Abbreviations: COPD, chronic obstructive pulmonary disease; ESRD, end stage renal disease; ICU, intensive care unit

631

632 **XIII. Secondary outcomes**

633 **a. Secondary outcomes**

634

**Secondary process and outcome measures**

| <i>Process measure</i>                                          | <i>Variable coding or calculation</i> |
|-----------------------------------------------------------------|---------------------------------------|
| Documentation of goals of care                                  | Binary (coded by NLP algorithm)       |
| Documentation of family meetings                                | Binary (coded by NLP algorithm)       |
| Documentation of durable power of attorney, surrogate, or proxy | Binary (coded by NLP algorithm)       |

|                                                         |                                                                                                                                    |
|---------------------------------------------------------|------------------------------------------------------------------------------------------------------------------------------------|
| Documentation of pain assessment                        | Binary                                                                                                                             |
| Palliative care team visits per patient                 | Restricted to patients receiving consultation                                                                                      |
| Use of bowel regimen for patients on opioids            | Binary; coded as present if a contraindication documented                                                                          |
| <b><i>Clinical outcome</i></b>                          | <b><i>Variable coding or calculation</i></b>                                                                                       |
| Pain scores (excluding dementia patients)               | Scores are standardized within hospitals                                                                                           |
| Dyspnea                                                 | Binary (coded by NLP algorithm)                                                                                                    |
| Code status (most recent at time of death or discharge) | Categorical; full, do not resuscitate, do not intubation                                                                           |
| Hospital mortality                                      | Binary; yes if death occurred in the hospital (excluding ICU) or patient transferred to inpatient hospice and died within 24 hours |
| ICU mortality                                           | Binary; yes if death occurred in the ICU or patient transferred from ICU to inpatient hospice and died within 24 hours             |
| Transfer to ICU after randomization                     | Binary                                                                                                                             |
| CPR after randomization                                 | Binary                                                                                                                             |
| Days of mechanical ventilation                          | Ordinal                                                                                                                            |
| Hospital discharge disposition                          | Categorical; home, home with home care, home hospice, inpatient hospice, nursing facility, long-term acute care facility, other    |
| 30-day hospital readmissions*                           | Binary                                                                                                                             |
| <b><i>Economic outcome</i></b>                          | <b><i>Variable coding or calculation</i></b>                                                                                       |
| Direct cost per hospitalization                         | Continuous; non-linear                                                                                                             |
| Direct cost per day                                     | Continuous; non-linear                                                                                                             |

---

Abbrv: NLP, natural language processing; ICU, intensive care unit; CPR, cardiopulmonary resuscitation

\*Limited to readmissions at an Ascension hospital

635 **b. Analysis of secondary outcomes**

636 Secondary outcomes will be analyzed using the mITT and ITT samples. We plan to analyze the data with  
637 mixed-effects logistic regression for binary outcomes and mixed-effects count models depending on the  
638 dispersion parameter for count outcomes. Count models will be formulated with an offset term to  
639 account for differential length of follow-up.  
640

~~XLV~~ **XIV. Approach to missing data**

642 We do not anticipate substantial missing data because outcomes will be obtained through the hospitals'  
643 EHR systems.

644

~~XV~~ **XV. Sample size and statistical power calculations**

646 **a. Sample size**

647 We queried the EHRs of two Ascension hospitals during calendar year 2013 to identify patients who  
648 would meet our eligibility criteria, and to determine how many of those patients had received PC.  
649 Around 961 patients met all eligibility criteria, of whom 79 (8.3%) received PC. By considering the

650 proportion of total beds in the 11-hospital sample accounted for by these two hospitals and  
651 extrapolating to all 11 hospitals during a 31-month enrollment period, we estimate that >15,000  
652 patients will be eligible for trial enrollment.

### 653 **b. Statistical power calculations**

654 Even using the conservative assumption of an intra-cluster (within-hospital) correlation of patient  
655 outcomes of up to  $\rho=0.20$  (design effect =  $1+(n-1)*\rho = 2.6$ ), this design provides greater than 80% power  
656 to detect a difference in the primary outcome between intervention and control of 0.5 days at the  
657 median with  $\alpha = 0.05$ . It provides >99% power to detect differences of 1 day at the median. These  
658 analyses assume that the composite outcome of hospital length of stay and mortality follows a log  
659 normal distribution with a median of 5.5 days (mean of 8.3 days) in the control group (corresponding to  
660 a standard deviation of 7.9 days). Unlike prior RCTs of PC, we will be specifically powered to determine  
661 how different PC team structures and practices influence the benefits of PC, and the characteristics of  
662 patients who derive the greatest benefits. Our estimates using the formula of Hughes and Hussey and  
663 confirmed with Monte Carlo simulation suggest that we will have 80% power to detect small effects for  
664 both patient-level effect modifiers (which vary among patients within and among hospitals) and cluster-  
665 level effect modifiers (which vary among services).

666

### ~~XVI.~~ **Data Safety & Monitoring Board (DSMB)**

668 Data and Safety Monitoring Board (DSMB) has been convened by the NIA to oversee the conduct of the  
669 REDAPS trial and monitor patient safety. The DSMB is comprised of individuals with expertise in  
670 palliative care, bioethics, clinical trial conduct, vulnerable populations, decision making, and  
671 biostatistics. The DSMB Chair, Dr. Joan Teno, is a world-renowned expert on measuring and evaluating  
672 interventions to improve the quality of medical care for seriously ill and dying patients. Members of the  
673 DSMB will not be involved in the conduct of the trial. Once convened, the DSMB will perform several  
674 duties. First, they will review and approve the research protocol and plans for data and safety  
675 monitoring prior to the study. Second, they will evaluate the progress of the trial. This will include  
676 assessment of data quality, participant accrual and retention, participant risk versus benefit, and study  
677 outcomes. The DSMB will meet regularly and make recommendations to the trial sponsor (NIA) about  
678 study progress and safety and will make recommendations about trial continuation. We will charge  
679 DSMB members with using their judgment in simultaneously considering many data points in making  
680 decisions about trial design modifications and trial continuation or termination.

681

### ~~XVII.~~ **Safety data and interim analysis**

#### 683 **a. Trial stopping rules / safety monitoring measures**

684 We do not plan to stop the trial early for evidence of the effectiveness of the intervention because doing  
685 so would markedly reduce our power to detect which types of PC are most useful and which types of  
686 patients derive the most benefit from PC. However, we do propose to stop the trial for early evidence of  
687 harm based on the primary outcome (composite measure of in-hospital mortality and hospital LOS).

#### 688 **b. Timing of analysis and adjustment of significance level**

689 If the DSMB agrees, we will implement the following statistical modifications to preserve the study-wide  
690 alpha level. We will calculate a Lan-DeMets spending function using O'Brien-Fleming boundaries to  
691 preserve the overall significance level of 0.05 for the interaction terms. The interim tests would use one-  
692 sided significance levels of 0.0007 and 0.0161. At the second interim analysis, for example, this is

693 equivalent to calculating a one-sided 98.39% lower confidence bound for the treatment coefficient in  
694 the primary outcome model. If the lower bound of the confidence interval for the change in the  
695 composite outcome exceeds two days at either interim analysis, we will propose early termination of  
696 the trial to the DSMB. Final analyses will be conducted at a significance level of 0.0451. This design  
697 allows for early termination if there is strong evidence of harm, without substantially impacting the  
698 significance level for the final analyses.

699 **c. Person performing analysis**

700 Statistical analysis will be performed by the trial’s statistician who will be blinded to trial arm. The trial’s  
701 data manager will be the only person who knows the identity of the arms during the trial’s conduct and  
702 will provide the statistician with primary outcomes and safety data with dummy variables indicating  
703 each arm. The analyst will return the results to the data manager for inclusion in the interim analysis  
704 report to the DSMB. All members of the investigative team except the data manager will remain blinded  
705 to treatment arm and facility for the analysis.  
706

**XVIII. References**

- 708 1. Lin, Winston, Scott D Halpern, Meeta Prasad Kerlin, and Dylan S Small. “A ‘Placement of Death’  
709 Approach for Studies of Treatment Effects on ICU Length of Stay.” *Statistical Methods in Medical*  
710 *Research* 26, no. 1 (February 2017): 292–311. doi:10.1177/0962280214545121.  
711 2. Baiocchi, Michael, Jing Cheng, and Dylan S. Small. "Instrumental Variable Methods for Causal  
712 Inference." *Statistics in Medicine* 33, no. 13 (2014): 2297-340. doi:10.1002/sim.6128.
